# Supplementary material for: Genome-Wide Interrogation of Mammalian Stem Cell Fate Determinants by Nested Chromosome Deletions
Source: PLoS Genet. 2010 Dec 9;6(12):e1001241. doi: 10.1371/journal.pgen.1001241 (PMC3000362; doi:10.1371/journal.pgen.1001241)
Supplement: Table S6 — Embryoid body screen raw data. Table presenting raw data obtained for primary and tertiary clones EB formation screening. EB number were counted manually and seeding densities were obtained by an automated evaluation of the methylene blue stained area. (0.18 MB XLS) [file pgen.1001241.s009.xls]

## Sheet: Primary clones
Supplemental Table 6: EB formation screen-raw data
	Clone ID	EB number #1	EB Number #2	Avg EB number	Methylene Blue
	5001	20	17	18.5	25.3178
	5002	9	11	10	18.662
	5003	11	8	9.5	17.6083
	5005	11	13	12	22.4952
	5006	15	12	13.5	20.101
	5007	9	6	7.5	11.0884
	5008	20	25	22.5	25.7878
	5009	8	4	6	15.0392
	5010	12	22	17	42.4431
	5011	8	6	7	8.85949
	5012	14	30	22	27.2502
	5013	25	22	23.5	44.348
	5014	0	1	0.5	0.147984
	5016	3	7	5	4.76802
	5017	16	19	17.5	48.4627
	5018	9	8	8.5	13.7477
	5020	20	16	18	35.9978
	5023	15	21	18	34.0479
	5025	23	28	25.5	51.0118
	5026	11	12	11.5	42.6683
	5027	15	5	10	27.952
	5029	6	9	7.5	27.2164
	5030	9	10	9.5	25.4245
	5032	9	12	10.5	53.7181
	5034	6	5	5.5	5.72102
	5035	8	10	9	17.9689
	5039	7	11	9	12.4271
	5041	2	2	2	6.83458
	5044	13	9	11	17.755
	5045	7	4	5.5	13.7733
	5048	0	0	0	1.74369
	5049	6	1	3.5	6.44662
	5050	16	17	16.5	45.7004
	5053	13	7	10	37.2437
	5056	13	13	13	21.5704
	5059	11	4	7.5	58.4767
	5061	10	8	9	18.9098
	5062	7	13	10	50.9415
	5064	8	3	5.5	25.3438
	5065	13	17	15	53.8669
	5066	15	25	20	74.8762
	5067	8	9	8.5	56.4212
	5068	8	11	9.5	36.8896
	5070	63	54	58.5	46.6344
	5071	46	47	46.5	49.5758
	5072	8	18	13	46.9251
	5074	11	8	9.5	42.5911
	5076	11	12	11.5	29.8085
	5077	9	11	10	39.1887
	5078	0	0	0	1.32925
	5079	1	3	2	2.86116
	5081	2	3	2.5	26.6661
	5082	1	1	1	1.37872
	5083	1	2	1.5	1.91945
	5084	0	3	1.5	12.6268
	5085	4	3	3.5	12.241
	5087	2	4	3	11.9368
	5088	1	3	2	3.92135
	5194	3	10	6.5	10.7108
	5201	0	0	0	2.10156
	5202	7	4	5.5	17.7099
	5204	11	15	13	38.6923
	5205	7	19	13	39.7889
	5206	0	1	0.5	2.97529
	5213	5	8	6.5	18.3161
	5214	3	3	3	11.9198
	5216	13	6	9.5	36.4855
	5217	6	6	6	9.86456
	5218	0	1	0.5	3.24869
	5221	0	8	4	41.4571
	5224	21	22	21.5	60.2558
	5225	16	19	17.5	52.4531
	5227	24	24	24	27.8105
	5233	3	7	5	7.58752
	5236	18	29	23.5	28.681
	5237	4	4	4	31.6142
	5238	0	2	1	4.78191
	5239	3	0	1.5	8.71975
	5241	40	46	43	26.1241
	5242	3	3	3	6.71785
	5244	2	0	1	1.62999
	5245	2	4	3	13.3519
	5246	4	8	6	33.5037
	5248	0	3	1.5	7.48788
	5249	11	6	8.5	32.0638
	5250	7	6	6.5	16.2634
	5253	38	29	33.5	44.7214
	5255	12	8	10	28.4957
	5256	9	14	11.5	26.8167
	5257	6	5	5.5	38.2045
	5258	9	16	12.5	54.3312
	5259	6	3	4.5	26.9343
	5260	25	19	22	48.3186
	5263	7	4	5.5	35.2066
	5265	4	1	2.5	8.37865
	5270	14	18	16	51.4334
	5271	25	37	31	27.9225
	5272	34	31	32.5	31.4971
	5273	23	26	24.5	28.6663
	5276	27	24	25.5	26.5702
	5278	34	34	34	19.9096
	5280	45	41	43	23.5342
	5282	30	32	31	28.9505
	5285	25	47	36	33.4664
	9	32	36	34	41.5487

## Sheet: Tertiary clones
	Clone ID	EB number #1	EB Number #2	Avg EB number	Methylene Blue
	5001.02	4	0	2	10.4647
	5001.03	0	0	0	1.02677
	5001.06	0	0	0	0.328949
	5001.08	0	0	0	0.430498
	5001.09	24	22	23	37.1048
	5001.15	1	0	0.5	3.12675
	5001.17	22	22	22	47.5604
	5001.18	0	1	0.5	6.83372
	5001.2	0	1	0.5	0.317666
	5001.21	32	27	29.5	21.5774
	5001.26	0	0	0	0.134531
	5001.3	6	7	6.5	15.6897
	5001.36	0	0	0	5.64204
	5001.37	0	0	0	0.0221324
	5001.38	0	0	0	0.410535
	5001.42	0	0	0	0.227834
	5002.12	5	6	5.5	29.5394
	5002.25	4	12	8	7.92732
	5002.28	11	3	7	21.1313
	5002.31	12	11	11.5	14.2316
	5002.32	15	16	15.5	28.4944
	5002.36	17	5	11	12.011
	5002.37	26	15	20.5	36.3493
	5003.01	16	10	13	10.5416
	5003.06	7	16	11.5	28.8108
	5003.09	0	0	0	0.0134531
	5003.11	0	0	0	0.0390572
	5003.15	0	0	0	0.00433969
	5003.2	0	0	0	0.624916
	5003.21	0	0	0	0.0247363
	5003.22	5	3	4	6.04997
	5003.25	0	0	0	0.0108492
	5003.27	31	24	27.5	46.4664
	5003.3	0	0	0	0.0438309
	5003.32	1	0	0.5	0.0177927
	5003.33	81	51	66	50.6286
	5003.35	37	39	38	25.6207
	5003.37	1	0	0.5	0.0551141
	5003.38	4	4	4	6.12591
	5003.4	5	4	4.5	3.43574
	5003.41	51	51	51	36.2347
	5003.44	79	66	72.5	61.4088
	5005.06	0	0	0	0.182267
	5005.14	6	2	4	1.9533
	5006.03	1	1	1	0.144946
	5006.13	1	0	0.5	0.114134
	5006.28	51	45	48	48.9066
	5006.32	3	3	3	0.155361
	5007.01	64	59	61.5	22.6706
	5007.02	24	40	32	24.4464
	5007.03	22	36	29	17.0689
	5007.04	25	39	32	16.4882
	5007.05	45	30	37.5	30.6825
	5007.06	34	47	40.5	31.0917
	5007.07	28	19	23.5	25.3907
	5007.08	31	29	30	22.7161
	5007.09	13	22	17.5	15.0757
	5007.1	26	28	27	12.129
	5007.11	50	40	45	28.7752
	5007.13	11	16	13.5	1.58442
	5007.14	47	29	38	6.03955
	5007.16	34	39	36.5	20.0151
	5007.17	21	25	23	13.1783
	5007.18	25	19	22	9.13332
	5007.19	32	30	31	21.2949
	5007.2	29	29	29	22.8737
	5007.21	14	16	15	11.4993
	5007.22	36	35	35.5	21.9771
	5007.23	32	31	31.5	21.0809
	5007.24	33	29	31	15.0396
	5007.25	36	30	33	13.71
	5007.26	53	35	44	7.81275
	5007.27	27	23	25	16.5151
	5007.28	16	21	18.5	7.0277
	5007.29	26	32	29	12.1911
	5007.3	11	11	11	6.53688
	5007.31	40	34	37	27.6018
	5007.32	24	9	16.5	4.19735
	5007.33	0	0	0	6.80855
	5007.34	11	9	10	35.1177
	5007.35	31	47	39	22.1463
	5007.36	32	28	30	7.37314
	5007.37	0	0	0	7.22733
	5007.38	39	37	38	16.8024
	5007.39	23	25	24	12.7288
	5007.4	57	47	52	10.9152
	5007.41	45	38	41.5	35.3854
	5007.42	3	2	2.5	0.745125
	5007.43	63	52	57.5	22.3733
	5007.44	57	43	50	16.1649
	5008.02	0	0	0	0.368874
	5008.06	0	0	0	1.67035
	5008.2	2	4	3	11.4047
	5008.24	0	0	0	0.0247363
	5008.25	3	5	4	26.0751
	5008.26	0	0	0	0.042963
	5008.31	0	0	0	0.56633
	5008.38	0	0	0	0.0746427
	5008.39	3	6	4.5	11.1617
	5008.42	0	2	1	9.4167
	5009.04	9	18	13.5	28.6724
	5009.06	0	0	0	5.71147
	5009.09	1	1	1	1.13483
	5009.1	0	0	0	1.73371
	5009.11	1	0	0.5	7.44735
	5009.14	2	0	1	9.80033
	5009.15	6	7	6.5	12.1546
	5009.23	0	0	0	0.042963
	5009.25	0	0	0	6.17712
	5009.28	0	0	0	0.16621
	5009.3	0	0	0	0.360195
	5009.31	2	6	4	17.0107
	5009.35	0	0	0	1.10836
	5009.4	0	0	0	0.057284
	5009.44	0	0	0	2.90673
	5010.02	23	27	25	20.6279
	5010.04	0	0	0	0.353251
	5010.05	0	0	0	0.195286
	5010.06	0	0	0	0.386233
	5010.14	1	2	1.5	0.73037
	5010.16	25	18	21.5	35.7708
	5010.17	1	3	2	0.660935
	5010.18	25	17	21	8.73167
	5010.19	5	3	4	5.42766
	5010.22	0	0	0	1.21121
	5010.24	1	0	0.5	9.36072
	5010.25	33	38	35.5	42.848
	5010.26	0	0	0	0.140172
	5010.27	1	0	0.5	1.69769
	5010.28	0	0	0	0.0538122
	5010.3	0	2	1	5.60819
	5010.34	2	1	1.5	10.417
	5010.35	0	0	0	0.381893
	5010.41	2	0	1	1.09881
	5010.42	0	0	0	0.298137
	5010.43	19	7	13	14.9042
	5010.44	0	0	0	0.133229
	5011.06	1	4	2.5	0.267325
	5011.25	2	2	2	0.835825
	5012.04	0	0	0	0.0347176
	5012.06	0	0	0	0.151455
	5013.03	18	12	15	33.4439
	5013.07	0	6	3	1.83395
	5013.1	10	4	7	5.64768
	5013.14	18	24	21	13.5841
	5013.15	0	3	1.5	0.45046
	5013.24	3	3	3	4.26852
	5013.26	5	0	2.5	1.07798
	5013.36	1	1	1	0.823674
	5013.4	2	2	2	2.11951
	5013.43	1	2	1.5	1.79533
	5014.06	2	0	1	0.162739
	5014.09	2	7	4.5	1.26198
	5014.1	4	7	5.5	2.58472
	5014.12	0	0	0	0.176192
	5014.13	2	4	3	0.834957
	5014.15	3	4	3.5	0.398384
	5014.24	5	14	9.5	0.848844
	5016.04	12	10	11	34.6872
	5016.05	1	2	1.5	0.516424
	5016.06	17	29	23	51.2071
	5016.07	40	30	35	64.2474
	5016.11	41	34	37.5	38.5426
	5016.12	47	46	46.5	79.1938
	5016.14	6	5	5.5	7.47903
	5016.16	2	3	2.5	0.874448
	5016.17	34	33	33.5	88.4356
	5016.22	0	1	0.5	0.0933034
	5016.25	48	46	47	62.614
	5016.28	0	0	0	0.353251
	5016.3	21	36	28.5	11.1114
	5016.32	1	6	3.5	1.0693
	5016.34	11	15	13	5.36126
	5016.38	0	3	1.5	6.83806
	5016.41	4	7	5.5	3.8467
	5016.42	5	5	5	1.35572
	5016.44	5	5	5	18.4832
	5017.04	0	1	0.5	0.0460008
	5017.05	0	0	0	0.670483
	5017.06	3	2	2.5	0.848844
	5017.1	6	14	10	4.56189
	5017.11	47	49	48	47.9384
	5018.01	0	0	0	0.975997
	5018.03	0	0	0	0.0920015
	5018.05	0	0	0	0.432667
	5018.19	13	15	14	25.1403
	5018.24	0	2	1	2.05441
	5018.25	3	4	3.5	4.63826
	5018.3	0	0	0	0.565462
	5018.34	0	0	0	0.375817
	5020.26	4	12	8	9.93877
	5020.27	3	6	4.5	2.89588
	5023.01	0	0	0	0.0941714
	5023.06	2	0	1	0.146682
	5023.12	0	0	0	0.177927
	5023.17	0	0	0	0.0338496
	5023.21	2	1	1.5	1.0897
	5023.24	0	0	0	0.014321
	5023.26	0	0	0	0.0295099
	5023.3	0	1	0.5	1.44859
	5023.44	0	0	0	2.5257
	5025.02	36	38	37	77.8033
	5025.08	12	21	16.5	18.2007
	5025.1	30	21	25.5	39.2677
	5025.11	39	39	39	47.0245
	5025.18	8	7	7.5	11.2112
	5025.23	0	0	0	0.0698691
	5025.27	8	14	11	16.3685
	5025.28	0	0	0	0.376251
	5025.3	0	2	1	24.6269
	5025.33	0	2	1	2.82948
	5026.01	7	6	6.5	19.5152
	5026.02	0	4	2	20.5923
	5026.04	7	1	4	31.1803
	5026.09	0	0	0	8.13128
	5026.14	0	0	0	0.22957
	5026.17	2	1	1.5	28.0852
	5026.18	0	0	0	0.638369
	5026.19	0	0	0	2.41113
	5026.21	0	0	0	0.454366
	5026.22	1	0	0.5	1.46812
	5026.26	7	3	5	49.6804
	5026.28	5	2	3.5	31.6203
	5026.29	9	15	12	27.5141
	5026.3	0	0	0	0.00737748
	5026.32	0	0	0	0.620142
	5026.36	0	1	0.5	1.49025
	5026.38	0	0	0	0.284684
	5026.42	20	20	20	13.8111
	5026.43	3	0	1.5	1.9355
	5026.44	3	2	2.5	22.2153
	5027.15	41	42	41.5	69.337
	5027.22	0	0	0	0.0164908
	5027.25	34	8	21	47.9684
	5027.29	0	0	0	0.0203966
	5027.35	1	2	1.5	16.9131
	5029.02	0	0	0	1.0463
	5029.03	0	0	0	0.00347176
	5029.07	31	38	34.5	47.843
	5029.13	76	65	70.5	87.0356
	5029.15	0	0	0	0.186607
	5029.22	0	0	0	0.14104
	5029.27	0	0	0	1.91511
	5029.3	0	0	0	0.124549
	5029.35	0	0	0	0.0933034
	5029.38	0	1	0.5	0.451328
	5030.05	1	0	0.5	0.780277
	5030.06	0	0	0	12.4076
	5030.07	11	11	11	31.1764
	5030.08	0	0	0	7.05461
	5030.1	14	10	12	21.1916
	5030.12	0	1	0.5	7.4378
	5030.14	0	0	0	0.22957
	5030.16	0	0	0	0.129323
	5030.17	1	7	4	10.834
	5030.18	0	0	0	0.183135
	5030.19	0	0	0	0.307684
	5030.2	0	0	0	0.299005
	5030.21	0	0	0	0.11587
	5030.22	1	3	2	7.51722
	5030.24	0	0	0	0.859693
	5030.25	0	0	0	0.0967752
	5030.26	9	2	5.5	20.985
	5030.27	4	4	4	2.46104
	5030.28	0	0	0	0.44829
	5030.29	0	0	0	1.80227
	5030.33	0	0	0	2.61553
	5030.43	0	0	0	0.223928
	5030.44	0	0	0	0.0785485
	5032.05	0	0	0	0.548103
	5032.06	0	0	0	0.098945
	5032.09	0	0	0	0.0412271
	5032.1	0	0	0	0.584991
	5032.11	0	0	0	0.158833
	5032.14	0	0	0	1.95764
	5032.15	0	0	0	0.247797
	5032.16	0	0	0	0.178795
	5032.17	0	0	0	0.00781145
	5032.2	0	0	0	0.104587
	5032.21	0	0	0	0.476932
	5032.23	27	42	34.5	32.4679
	5032.24	0	0	0	0.0798504
	5032.25	0	0	0	0.0902656
	5034.01	0	0	0	0.0867939
	5034.02	5	0	2.5	0.559821
	5034.03	0	0	0	0.0312458
	5034.06	1	0	0.5	0.0789824
	5034.09	0	0	0	0.269061
	5034.11	0	0	0	0.242155
	5034.12	0	0	0	0.0902656
	5034.15	0	2	1	0.183569
	5034.17	3	1	2	0.293797
	5034.18	0	0	0	2.64418
	5034.19	2	5	3.5	1.83439
	5034.23	0	5	2.5	0.603217
	5034.24	2	0	1	0.116738
	5034.26	15	8	11.5	4.36096
	5034.28	8	12	10	3.65142
	5034.3	1	6	3.5	2.83425
	5034.32	0	1	0.5	0.134964
	5034.37	10	4	7	1.60178
	5034.38	4	3	3.5	3.22266
	5035.01	21	16	18.5	52.6218
	5035.02	7	11	9	34.7037
	5035.03	1	0	0.5	0.179663
	5035.06	0	0	0	0.0273401
	5035.07	0	1	0.5	17.0901
	5035.08	0	0	0	0.0690011
	5035.1	7	7	7	34.534
	5035.11	0	0	0	4.57751
	5035.18	0	0	0	0.290326
	5035.2	0	0	0	0.071171
	5035.22	2	0	1	0.424422
	5035.24	9	9	9	41.1225
	5035.25	9	7	8	30.9346
	5035.26	0	0	0	0.135832
	5035.27	8	4	6	3.41013
	5035.28	0	0	0	0.401856
	5035.29	0	0	0	0.574142
	5035.3	0	0	0	0.163606
	5035.33	5	5	5	2.34951
	5035.34	7	2	4.5	20.5055
	5035.36	9	15	12	29.0521
	5035.37	19	9	14	45.3724
	5035.38	2	1	1.5	5.80911
	5035.39	2	0	1	0.53682
	5035.4	0	0	0	0.0321137
	5035.41	5	6	5.5	20.6726
	5039.07	0	0	0	0.0642275
	5041.11	3	5	4	6.51171
	5041.23	0	0	0	0.154059
	5044.3	6	6	6	1.5714
	5045.01	4	9	6.5	16.26
	5045.02	0	0	0	0.140172
	5045.03	2	2	2	1.57704
	5045.04	16	5	10.5	16.2409
	5045.05	0	0	0	0.310722
	5045.08	1	0	0.5	0.394044
	5045.1	1	0	0.5	0.321137
	5045.13	25	29	27	47.5114
	5045.14	0	0	0	0.0321137
	5045.16	0	0	0	3.83629
	5045.18	0	0	0	4.85048
	5045.19	17	15	16	22.0443
	5045.21	4	14	9	18.1217
	5045.22	29	32	30.5	32.8077
	5045.24	0	0	0	0.374516
	5045.25	0	0	0	0.187909
	5045.26	14	20	17	50.1946
	5045.27	0	0	0	1.54797
	5045.28	26	41	33.5	32.237
	5045.32	12	13	12.5	11.255
	5045.33	26	32	29	29.3146
	5045.34	0	0	0	1.33359
	5045.36	28	26	27	35.7543
	5045.38	11	9	10	20.936
	5045.39	0	0	0	0.133663
	5045.4	18	21	19.5	26.3511
	5045.42	0	0	0	1.344
	5045.43	17	16	16.5	42.9144
	5048.02	0	0	0	11.8764
	5048.03	0	0	0	3.90746
	5048.06	0	0	0	0.273401
	5048.07	0	0	0	4.58923
	5048.08	0	0	0	4.54279
	5048.09	0	0	0	10.5333
	5048.1	0	0	0	3.66097
	5048.12	0	0	0	13.138
	5048.13	0	0	0	2.34474
	5048.15	0	0	0	1.14611
	5048.19	0	0	0	15.5617
	5048.23	0	0	0	6.73954
	5048.3	0	0	0	2.39421
	5048.31	0	0	0	9.15241
	5048.34	0	0	0	3.96605
	5048.35	0	0	0	0.108058
	5048.38	0	0	0	0.239117
	5048.41	0	0	0	1.00768
	5048.42	0	0	0	0.0460008
	5048.44	0	0	0	0.0347176
	5049.03	0	0	0	2.12775
	5049.05	36	30	33	52.3497
	5049.09	0	0	0	0.014321
	5049.13	0	0	0	2.48014
	5049.19	4	5	4.5	6.74258
	5049.21	30	28	29	37.2172
	5049.22	5	8	6.5	6.85672
	5049.24	16	13	14.5	10.8627
	5049.29	0	0	0	1.77493
	5049.3	1	2	1.5	10.2486
	5049.32	0	1	0.5	2.15075
	5049.36	0	1	0.5	5.60558
	5049.38	5	11	8	3.79984
	5049.43	0	0	0	0.182267
	5050.11	0	0	0	0.0238683
	5050.12	0	0	0	0.0056416
	5050.25	0	0	0	0.0555481
	5050.31	0	0	0	0.115002
	5050.4	0	0	0	0.0759446
	5050.44	0	0	0	0.0668313
	5053.03	17	10	13.5	26.6796
	5053.05	19	21	20	34.6186
	5056.02	6	6	6	30.8183
	5056.06	6	9	7.5	35.4531
	5056.11	38	35	36.5	17.8392
	5056.12	14	8	11	28.5331
	5056.16	6	8	7	4.2976
	5056.18	0	0	0	0.144946
	5056.2	15	8	11.5	30.8335
	5056.21	3	5	4	35.7712
	5056.23	7	6	6.5	25.5751
	5056.24	30	19	24.5	65.2612
	5056.25	8	3	5.5	22.4939
	5056.26	26	40	33	64.0869
	5056.3	16	12	14	30.3618
	5056.33	6	6	6	17.5506
	5056.34	5	7	6	20.18
	5056.36	4	10	7	18.8503
	5056.37	9	7	8	22.484
	5056.44	4	5	4.5	22.4497
	5059.04	16	21	18.5	24.8239
	5059.06	4	6	5	0.809787
	5059.08	20	20	20	33.2238
	5059.09	2	7	4.5	8.19638
	5059.17	47	38	42.5	67.6064
	5059.21	1	4	2.5	0.831919
	5061.01	1	2	1.5	41.5335
	5061.03	0	0	0	0.0716049
	5061.04	2	1	1.5	5.91413
	5061.05	8	5	6.5	4.76108
	5061.06	4	7	5.5	17.42
	5061.08	4	12	8	14.1982
	5061.1	9	13	11	57.8937
	5061.12	25	18	21.5	10.4539
	5061.13	7	5	6	7.76024
	5061.15	0	1	0.5	0.0598878
	5061.17	20	17	18.5	5.777
	5061.18	0	0	0	0.0824542
	5061.19	0	0	0	0.390572
	5061.21	0	0	0	0.0303779
	5061.23	0	0	0	55.302
	5061.24	0	0	0	0.365836
	5061.25	0	0	0	0.123247
	5061.27	1	2	1.5	31.5583
	5061.28	2	2	2	1.04153
	5061.29	9	10	9.5	6.85932
	5061.33	0	0	0	0.525971
	5061.35	0	0	0	0
	5061.36	0	0	0	0.729937
	5061.38	3	4	3.5	17.6977
	5061.39	0	1	0.5	0.264721
	5061.4	9	0	4.5	37.6364
	5061.41	0	0	0	0.101115
	5061.42	9	5	7	33.7077
	5062.03	4	3	3.5	36.4916
	5062.09	0	2	1	13.0451
	5062.12	1	1	1	24.9606
	5062.18	4	1	2.5	18.8486
	5062.2	0	0	0	23.3233
	5062.23	2	0	1	21.4567
	5062.24	12	15	13.5	35.1159
	5062.28	4	1	2.5	17.2282
	5062.3	0	0	0	0
	5062.33	4	5	4.5	0.749899
	5062.39	0	0	0	0.0820202
	5064.02	2	3	2.5	1.3427
	5064.03	3	1	2	1.30321
	5064.05	0	0	0	0.531613
	5064.06	7	1	4	4.49462
	5064.07	2	1	1.5	2.3404
	5064.1	12	12	12	12.4528
	5064.12	4	3	3.5	1.38566
	5064.16	2	1	1.5	2.00364
	5064.17	3	6	4.5	2.6624
	5064.21	12	6	9	13.1449
	5064.25	0	6	3	5.29529
	5064.26	14	10	12	5.70626
	5064.27	0	0	0	1.04022
	5064.29	47	47	47	80.4492
	5064.31	2	1	1.5	4.74329
	5064.32	0	0	0	0.505574
	5064.33	0	0	0	0.0325477
	5064.34	17	17	17	36.1436
	5064.35	3	1	2	3.64664
	5064.36	6	4	5	2.19502
	5064.37	3	3	3	2.33085
	5064.38	1	1	1	0.999432
	5064.39	2	8	5	17.8544
	5064.4	3	1	2	0.597576
	5064.41	1	0	0.5	0.271665
	5064.42	1	3	2	2.87418
	5064.43	4	0	2	2.10475
	5064.44	6	9	7.5	5.31439
	5065.01	0	3	1.5	0.0720389
	5065.02	9	10	9.5	10.7972
	5065.03	0	2	1	0.422686
	5065.04	0	0	0	0.0820202
	5065.05	0	0	0	0.411403
	5065.06	4	3	3.5	3.63666
	5065.07	0	0	0	0.123681
	5065.08	15	9	12	6.32641
	5065.09	8	9	8.5	4.88519
	5065.1	49	58	53.5	73.1542
	5065.11	7	8	7.5	6.78815
	5065.13	7	10	8.5	7.50637
	5065.15	1	4	2.5	4.25898
	5065.17	12	15	13.5	12.9449
	5065.18	44	44	44	70.7739
	5065.19	5	7	6	3.18794
	5065.2	26	19	22.5	21.2671
	5065.21	11	10	10.5	8.27102
	5065.22	0	0	0	0.7052
	5065.23	0	0	0	0.0794164
	5065.24	3	0	1.5	0.229136
	5065.26	1	1	1	0.198758
	5065.27	10	14	12	12.2883
	5065.28	5	10	7.5	7.93556
	5065.29	35	48	41.5	78.2729
	5065.3	5	8	6.5	4.04633
	5065.31	5	3	4	2.82254
	5065.32	7	10	8.5	9.8932
	5065.33	2	3	2.5	4.79493
	5065.34	65	52	58.5	64.7517
	5065.35	4	1	2.5	0.312458
	5065.36	8	10	9	3.53338
	5065.37	4	6	5	2.7314
	5065.38	15	24	19.5	8.62297
	5065.39	0	0	0	0.129757
	5066.07	3	5	4	36.2651
	5066.09	0	0	0	1.46291
	5066.12	0	0	0	11.3878
	5066.16	0	0	0	0.165342
	5066.18	0	1	0.5	12.9792
	5066.2	8	3	5.5	13.9617
	5066.25	0	0	0	9.06953
	5066.26	0	0	0	0.328081
	5066.28	4	3	3.5	4.80057
	5066.32	0	0	0	16.6163
	5067.01	8	11	9.5	34.4381
	5067.03	4	9	6.5	11.1448
	5067.09	0	6	3	22.5638
	5067.3	5	21	13	23.1523
	5067.35	7	5	6	19.9622
	5067.36	2	6	4	4.84657
	5067.41	14	15	14.5	26.0425
	5067.42	0	0	0	0.0898317
	5067.44	12	11	11.5	5.88029
	5068.04	0	0	0	0.0303779
	5068.05	6	9	7.5	15.2866
	5068.06	23	23	23	30.5666
	5068.09	34	34	34	29.6688
	5068.11	0	1	0.5	6.88145
	5068.2	21	26	23.5	32.4201
	5068.22	10	11	10.5	32.0703
	5068.23	4	2	3	18.2567
	5068.24	23	17	20	18.0974
	5068.25	49	39	44	43.4056
	5068.28	11	21	16	34.5249
	5068.29	1	1	1	8.12174
	5068.3	10	9	9.5	16.6458
	5068.32	42	34	38	42.1731
	5068.33	19	31	25	23.8158
	5068.34	29	34	31.5	22.5694
	5068.35	1	6	3.5	7.10929
	5068.42	2	0	1	16.9287
	5068.43	0	0	0	0.177493
	5070.05	10	18	14	14.479
	5070.07	8	8	8	20.9937
	5070.13	0	0	0	0.0321137
	5070.14	0	0	0	0.0199626
	5070.15	14	25	19.5	22.319
	5070.19	8	14	11	4.55147
	5070.21	0	2	1	4.0268
	5070.25	0	0	0	0.100247
	5070.26	1	2	1.5	0.221758
	5070.27	0	0	0	0.471291
	5070.39	15	12	13.5	13.9981
	5070.41	0	2	1	3.51168
	5071.03	11	7	9	1.41257
	5071.05	8	2	5	23.8297
	5071.09	36	35	35.5	27.4065
	5071.11	11	14	12.5	24.4281
	5071.12	24	23	23.5	15.5322
	5071.14	3	0	1.5	1.2303
	5071.15	10	12	11	24.646
	5071.21	3	11	7	7.56843
	5071.23	38	34	36	25.947
	5071.28	18	28	23	21.1187
	5071.3	11	16	13.5	28.4792
	5071.31	5	4	4.5	4.00467
	5071.37	29	34	31.5	26.1575
	5071.38	14	18	16	7.66216
	5071.39	20	24	22	20.5116
	5071.44	41	53	47	29.585
	5072.01	0	0	0	0.0290759
	5072.09	13	20	16.5	53.4529
	5072.13	0	0	0	7.7125
	5072.15	0	0	0	0.301609
	5072.16	0	0	0	23.1592
	5072.19	0	0	0	0.287722
	5072.21	0	5	2.5	28.4758
	5072.25	0	0	0	0.126719
	5072.3	7	2	4.5	8.03017
	5072.31	0	0	0	0.633595
	5074.06	13	15	14	10.4647
	5074.07	77	68	72.5	75.6721
	5074.12	1	4	2.5	2.17419
	5074.13	52	61	56.5	66.0697
	5074.14	26	26	26	21.209
	5074.18	10	2	6	10.9664
	5074.24	11	12	11.5	14.4781
	5074.25	1	1	1	1.24332
	5074.26	41	41	41	28.4454
	5074.31	16	12	14	1.69725
	5074.32	14	27	20.5	18.5813
	5074.34	16	21	18.5	15.0661
	5074.38	29	24	26.5	15.1685
	5074.39	1	6	3.5	0.294231
	5074.42	1	2	1.5	14.2594
	5074.43	23	24	23.5	41.931
	5076.05	0	0	0	0.137134
	5076.06	1	0	0.5	0.90743
	5076.07	0	0	0	0.0763786
	5076.08	0	0	0	1.83829
	5076.11	26	26	26	24.9697
	5076.13	0	1	0.5	1.23725
	5076.16	24	25	24.5	23.4777
	5076.17	0	0	0	0.453932
	5076.18	0	1	0.5	0.410969
	5076.2	0	0	0	0.0407931
	5076.21	1	0	0.5	0.0364534
	5076.3	0	0	0	0.0355855
	5076.31	0	0	0	0.00737748
	5076.38	0	0	0	0.304213
	5076.39	0	0	0	0.64618
	5076.41	0	0	0	0.272099
	5076.43	1	0	0.5	0.0815862
	5076.44	0	0	0	0.306382
	5077.08	29	23	26	19.6562
	5077.16	5	1	3	1.04153
	5077.21	14	15	14.5	16.6197
	5077.22	8	3	5.5	0.993356
	5077.25	3	4	3.5	1.86433
	5077.34	47	39	43	60.3447
	5077.37	7	1	4	2.00667
	5077.39	25	25	25	70.8781
	5077.42	12	7	9.5	9.34249
	5077.44	1	0	0.5	2.49793
	5078.01	23	21	22	15.2662
	5078.02	6	11	8.5	7.51418
	5078.03	0	0	0	0.222626
	5078.05	6	2	4	4.49158
	5078.09	3	2	2.5	1.78448
	5078.12	18	17	17.5	7.1171
	5078.13	27	15	21	6.73607
	5078.16	0	0	0	1.01071
	5078.19	30	24	27	20.5923
	5079.26	8	3	5.5	20.1496
	5079.27	0	0	0	1.93594
	5079.29	4	6	5	14.6864
	5079.32	0	0	0	0.876184
	5079.38	7	9	8	18.8165
	5081.04	0	0	0	1.57835
	5081.06	4	3	3.5	10.1314
	5081.08	0	0	0	1.81703
	5081.1	22	11	16.5	21.8803
	5081.11	20	21	20.5	38.4315
	5081.12	4	3	3.5	9.58161
	5081.13	1	0	0.5	0.910902
	5081.16	1	1	1	0.469989
	5081.17	2	0	1	0.720389
	5081.18	7	3	5	1.25851
	5081.2	0	0	0	0.71388
	5081.21	0	0	0	0.386233
	5081.22	5	1	3	2.71231
	5081.27	4	3	3.5	2.55782
	5081.29	0	0	0	0.469121
	5081.32	4	1	2.5	1.83265
	5081.33	4	1	2.5	1.3158
	5081.34	5	4	4.5	1.3401
	5081.35	0	0	0	0.167946
	5081.38	0	0	0	1.09968
	5081.39	0	0	0	0.539858
	5081.4	0	1	0.5	0.368874
	5081.41	1	0	0.5	0.266891
	5081.43	1	0	0.5	0.358893
	5081.44	5	2	3.5	3.3906
	5082.02	11	18	14.5	24.4025
	5082.03	11	6	8.5	2.14554
	5082.04	3	8	5.5	1.16564
	5082.09	9	14	11.5	12.1785
	5082.12	11	7	9	12.2826
	5082.13	12	15	13.5	9.34727
	5082.19	3	1	2	0.165342
	5082.21	11	24	17.5	2.80127
	5082.22	34	17	25.5	28.3269
	5082.23	3	6	4.5	1.84263
	5082.29	17	11	14	9.88148
	5082.31	22	9	15.5	16.2773
	5082.37	4	4	4	0.197456
	5082.38	17	19	18	2.67846
	5082.39	12	15	13.5	12.0661
	5082.41	2		2	4.31452
	5082.44	22	21	21.5	17.4703
	5083.04	0	0	0	0.0529443
	5083.1	0	0	0	0.0841901
	5083.11	0	0	0	1.67599
	5083.13	0	0	0	0.124115
	5083.14	0	0	0	0.0312458
	5083.15	0	0	0	0.0781145
	5083.17	0	0	0	0.0525103
	5083.18	0	0	0	0.701295
	5083.19	40	54	47	66.2255
	5083.2	0	0	0	0.349779
	5083.22	12	26	19	20.0351
	5083.24	0	0	0	0.31159
	5083.26	0	0	0	1.61957
	5083.27	0	0	0	0.411403
	5083.28	0	0	0	1.00073
	5083.29	0	0	0	0.418346
	5083.32	1	1	1	0.70954
	5083.33	0	0	0	0.00737748
	5083.35	0	0	0	0.0512084
	5083.36	0	0	0	1.97413
	5083.37	0	0	0	0.0264721
	5083.39	0	0	0	1.11834
	5083.4	0	0	0	0.028642
	5083.41	0	0	0	0.0056416
	5083.42	0	0	0	0.342836
	5083.43	0	0	0	0.176626
	5083.44	0	0	0	0.409233
	5084.01	1	0	0.5	2.6598
	5084.06	0	0	0	5.0475
	5084.07	0	0	0	0.330685
	5084.12	9	6	7.5	3.29383
	5084.17	3	1	2	0.664841
	5084.26	0	1	0.5	0.36193
	5084.27	1	2	1.5	0.203098
	5084.28	1	3	2	0.717351
	5084.33	0	2	1	0.159267
	5084.35	0	1	0.5	0.255608
	5084.36	10	10	10	4.43994
	5084.37	2	8	5	1.2034
	5084.41	1	0	0.5	0.0785485
	5084.44	0	0	0	0.163172
	5085.02	0	0	0	0.0676992
	5085.15	3	2	2.5	0.281646
	5085.16	7	6	6.5	1.84741
	5085.17	0	0	0	0.122813
	5085.2	0	0	0	0.0585859
	5085.26	0	0	0	0.0394912
	5085.32	9	8	8.5	5.42071
	5085.33	0	0	0	0.124983
	5085.37	3	2	2.5	0.457404
	5087.03	14	5	9.5	2.80865
	5087.04	4	3	3.5	1.69291
	5087.05	1	1	1	1.22857
	5087.06	0	0	0	0.112832
	5087.07	8	1	4.5	2.44368
	5087.09	2	3	2.5	1.0246
	5087.1	7	5	6	2.23798
	5087.13	13	12	12.5	17.4955
	5087.15	4	2	3	6.87451
	5087.16	0	0	0	10.5003
	5087.17	3	3	3	2.73704
	5087.18	0	3	1.5	1.85088
	5087.19	0	0	0	0.200928
	5087.2	24	7	15.5	4.47162
	5087.21	11	2	6.5	6.14197
	5087.22	10	4	7	3.52557
	5087.23	2	3	2.5	2.05094
	5087.25	0	0	0	0.206135
	5087.26	1	2	1.5	0.394912
	5087.27	20	16	18	13.9092
	5087.28	0	0	0	0.00216985
	5087.29	11	7	9	3.93393
	5087.3	13	18	15.5	18.284
	5087.32	1	1	1	0.333722
	5087.33	0	3	1.5	3.39798
	5087.34	0	0	0	0.117606
	5087.38	1	1	1	0.88009
	5087.4	44	26	35	26.4713
	5087.41	2	0	1	1.99366
	5087.42	1	0	0.5	1.89775
	5087.44	0	0	0	0.269495
	5087.44	0	0	0	0.0598878
	5088.02	25	18	21.5	22.0825
	5088.05	10	8	9	7.22646
	5088.06	3	3	3	2.53612
	5088.1	7	2	4.5	5.9801
	5088.13	3	0	1.5	0.91177
	5088.14	2	0	1	3.49779
	5088.15	5	9	7	4.42171
	5088.16	5	6	5.5	9.418
	5088.17	3	5	4	3.98471
	5088.18	8	11	9.5	8.98056
	5088.2	25	16	20.5	17.7697
	5088.21	4	4	4	18.3942
	5088.22	13	18	15.5	19.8307
	5088.24	5	3	4	1.61133
	5088.27	4	3	3.5	4.43387
	5088.3	5	10	7.5	7.45993
	5088.32	0	0	0	6.21618
	5088.33	7	6	6.5	10.5099
	5088.38	1	0	0.5	0.328949
	5194.2	24	43	33.5	69.3375
	5201.05	1	11	6	8.62514
	5201.06	32	39	35.5	24.4156
	5201.1	0	0	0	0.965582
	5201.11	0	1	0.5	8.48497
	5201.12	2	2	2	4.61223
	5201.14	13	9	11	19.0261
	5201.17	14	20	17	27.3422
	5201.19	0	0	0	0.0477366
	5201.21	5	4	4.5	7.77413
	5202.08	51	48	49.5	60.9345
	5202.2	2	5	3.5	1.01245
	5202.26	0	0	0	0.0269061
	5202.28	0	0	0	0.100681
	5202.29	0	0	0	0.552877
	5202.3	1	3	2	0.76856
	5204.03	14	7	10.5	47.6012
	5204.07	6	4	5	1.0923
	5204.1	0	0	0	0.028642
	5204.11	9	15	12	20.5615
	5204.15	1	0	0.5	1.04239
	5204.18	1	1	1	0.555047
	5204.2	0	3	1.5	0.234343
	5204.22	1	0	0.5	4.64043
	5204.26	0	0	0	0.665275
	5204.27	0	0	0	0.101983
	5204.3	1	0	0.5	0.154059
	5204.33	0	0	0	17.9945
	5205.02	18	26	22	16.2621
	5205.03	26	47	36.5	20.2633
	5205.04	25	37	31	22.8663
	5205.06	0	0	0	0.0112832
	5205.1	0	0	0	0.612765
	5205.11	24	37	30.5	18.5196
	5205.12	8	9	8.5	35.2895
	5205.17	0	1	0.5	9.99128
	5205.18	0	0	0	4.60355
	5205.2	25	33	29	19.4653
	5205.21	0	2	1	33.6192
	5205.28	20	24	22	17.2512
	5205.33	0	0	0	2.72837
	5205.34	15	27	21	18.5079
	5205.36	0	0	0	2.9319
	5205.38	13	25	19	11.4399
	5205.39	27	22	24.5	15.0713
	5205.42	24	9	16.5	16.9283
	5205.43	0	0	0	0.769862
	5205.44	1	0	0.5	5.62555
	5206.1	7	5	6	26.657
	5213.06	0	0	0	0.34327
	5213.24	0	0	0	0.181399
	5213.25	0	0	0	0.111096
	5213.27	0	0	0	0.190947
	5213.29	0	0	0	2.05875
	5213.32	0	0	0	0.586293
	5213.36	0	0	0	0.0264721
	5213.38	0	0	0	0.0182267
	5213.41	0	0	0	0.0733408
	5214.03	0	0	0	3.68874
	5214.06	0	0	0	8.47759
	5214.08	4	4	4	21.7206
	5214.09	0	0	0	0.17489
	5214.11	3	2	2.5	35.1841
	5214.12	0	1	0.5	6.19405
	5214.14	5	0	2.5	16.2439
	5214.15	0	1	0.5	0.454366
	5214.17	0	0	0	1.14915
	5214.18	0	0	0	2.76395
	5214.19	0	0	0	0.893977
	5214.2	0	0	0	10.1006
	5214.21	0	0	0	1.18213
	5214.22	0	0	0	32.2548
	5214.23	1	0	0.5	19.3585
	5214.25	0	0	0	0.509914
	5214.27	0	4	2	11.7363
	5214.28	0	0	0	10.1827
	5214.29	0	0	0	0.216551
	5214.31	0	0	0	0.838429
	5214.32	33	13	23	42.9595
	5214.33	8	7	7.5	9.36419
	5214.34	0	0	0	4.24162
	5214.36	69	58	63.5	44.5031
	5214.37	0	0	0	1.05021
	5214.38	0	0	0	0.25257
	5214.39	0	0	0	0.527273
	5214.4	0	0	0	2.17419
	5214.41	0	0	0	5.65853
	5214.42	0	0	0	4.69078
	5214.43	0	0	0	0.494725
	5214.44	25	17	21	23.0108
	5216.01	18	10	14	23.6201
	5217.03	1	0	0.5	1.01809
	5217.12	0	0	0	1.11096
	5217.14	0	0	0	0.216985
	5217.15	15	6	10.5	9.53735
	5217.17	9	5	7	5.17031
	5217.19	0	1	0.5	4.69294
	5217.21	5	5	5	3.94522
	5217.22	35	28	31.5	34.5839
	5217.24	22	16	19	7.31238
	5217.27	8	12	10	3.75167
	5217.32	1	0	0.5	0.131493
	5218.1	0	0	0	0.0607557
	5218.14	0	0	0	1.2481
	5218.17	0	0	0	1.52844
	5218.23	0	0	0	0.493857
	5218.24	0	0	0	9.89537
	5218.25	1	1	1	3.98167
	5218.28	0	0	0	0.137568
	5218.3	0	0	0	0.126285
	5218.31	0	0	0	0.184003
	5218.32	18	25	21.5	14.0415
	5218.34	0	0	0	0.651822
	5218.35	1	0	0.5	0.235645
	5218.36	2	4	3	17.8201
	5218.38	3	1	2	4.9568
	5218.4	1	2	1.5	1.23551
	5218.41	2	0	1	1.70159
	5221.01	3	1	2	4.57968
	5221.02	0	0	0	0.616237
	5221.04	0	0	0	0.800674
	5221.06	0	0	0	0.143644
	5221.08	1	0	0.5	5.71538
	5221.11	0	0	0	0.521197
	5221.12	0	0	0	0.0637935
	5221.13	1	0	0.5	0.516424
	5221.15	0	0	0	0.0546801
	5221.16	0	1	0.5	0.424422
	5221.17	0	0	0	0.423554
	5221.19	1	0	0.5	2.95663
	5221.21	0	0	0	0.496895
	5221.22	16	17	16.5	18.938
	5221.23	0	0	0	0.190947
	5221.24	0	0	0	0.296835
	5221.25	42	38	40	43.4742
	5221.26	5	4	4.5	12.5717
	5221.27	0	0	0	10.3181
	5221.29	42	32	37	29.1992
	5221.3	0	0	0	3.38496
	5221.31	0	0	0	0.19572
	5221.33	0	0	0	0.36627
	5221.34	0	0	0	0.632293
	5221.35	14	15	14.5	12.3751
	5221.36	0	0	0	1.02634
	5221.38	0	0	0	0.14321
	5221.39	1	5	3	3.89097
	5224.14	2	3	2.5	2.81125
	5224.17	0	0	0	0.154059
	5224.2	3	4	3.5	2.16724
	5224.21	0	0	0	0.229136
	5224.22	22	18	20	18.3986
	5224.27	0	0	0	0.621444
	5225.01	6	19	12.5	10.1618
	5225.02	0	0	0	0.110228
	5225.03	10	5	7.5	16.1723
	5225.04	30	21	25.5	14.308
	5225.06	0	1	0.5	0.45697
	5225.08	0	0	0	0.166644
	5225.09	0	1	0.5	0.767258
	5225.1	6	3	4.5	21.9168
	5225.15	2	3	2.5	1.47116
	5225.18	0	0	0	1.62435
	5225.19	0	1	0.5	0.62101
	5225.2	2	21	11.5	9.65929
	5225.21	3	7	5	5.89287
	5225.22	1	0	0.5	1.62739
	5225.23	1	0	0.5	0.808485
	5225.25	7	11	9	5.39207
	5225.26	0	2	1	0.414875
	5225.28	1	1	1	0.406629
	5225.29	0	1	0.5	0.411837
	5225.31	0	0	0	0.222192
	5225.32	0	0	0	0.847108
	5225.33	5	3	4	13.575
	5225.34	0	0	0	0.480838
	5225.35	21	20	20.5	13.3094
	5225.36	0	0	0	0.150153
	5225.37	0	0	0	0.179229
	5225.38	0	0	0	0.161003
	5225.4	3	1	2	0.387535
	5225.42	2	0	1	0.139304
	5225.43	0	1	0.5	0.268627
	5225.44	1	0	0.5	2.08088
	5227.06	0	0	0	0.730804
	5227.1	33	42	37.5	17.1105
	5227.16	0	0	0	21.8851
	5227.23	18	12	15	6.58288
	5227.35	0	0	0	0.326779
	5227.39	6	19	12.5	3.87057
	5227.4	15	12	13.5	14.5822
	5227.44	0	0	0	0.17489
	5233.17	0	1	0.5	0.669615
	5233.2	3	2	2.5	1.59267
	5233.23	93	85	89	48.0304
	5236.02	24	25	24.5	29.9504
	5236.09	2	5	3.5	2.00103
	5236.23	71	53	62	42.7785
	5236.24	34	32	33	22.0296
	5236.27	0	0	0	0.0551141
	5237.01	0	0	0	3.88489
	5237.02	0	0	0	0.0390572
	5237.07	7	3	5	21.5817
	5237.08	20	27	23.5	31.3139
	5237.12	2	4	3	13.6548
	5237.17	0	0	0	0.0655294
	5237.18	0	0	0	55.1302
	5238.02	2	2	2	6.94872
	5238.03	11	8	9.5	13.8718
	5238.04	13	21	17	14.9003
	5238.05	2	1	1.5	4.65996
	5238.06	15	13	14	16.8202
	5238.07	5	4	4.5	6.24178
	5238.08	16	17	16.5	13.2239
	5238.09	3	4	3.5	6.71264
	5238.11	0	0	0	3.35979
	5238.12	2	8	5	4.35966
	5238.13	15	12	13.5	16.5659
	5238.15	32	14	23	22.7556
	5238.18	0	4	2	5.14167
	5238.19	1	0	0.5	1.43948
	5238.2	1	3	2	4.48855
	5238.21	2	2	2	5.95406
	5238.23	1	4	2.5	4.66213
	5238.24	19	23	21	16.6974
	5238.26	2	3	2.5	3.66227
	5238.27	1	0	0.5	1.95677
	5238.28	15	22	18.5	20.8674
	5238.29	0	0	0	1.10489
	5238.3	24	21	22.5	28.5925
	5238.31	0	1	0.5	0.916977
	5238.32	49	44	46.5	43.364
	5238.33	55		55	68.9569
	5238.34	3	2	2.5	3.59717
	5238.35	0	1	0.5	2.42893
	5238.36	3	13	8	62.9733
	5238.37	0	7	3.5	4.69251
	5238.38	10	11	10.5	11.2832
	5238.39	2	1	1.5	1.58746
	5238.4	6	3	4.5	8.49408
	5238.41	8	4	6	5.89461
	5238.42	6	4	5	8.10915
	5238.44	12	6	9	8.61863
	5239.1	12	7	9.5	10.0512
	5239.23	21	8	14.5	18.2033
	5239.36	13	12	12.5	5.33262
	5241.01	2	0	1	1.91945
	5241.02	0	3	1.5	0.749031
	5241.04	3	3	3	4.45339
	5241.05	2	6	4	5.60037
	5241.06	42	46	44	34.7327
	5241.07	31	37	34	15.806
	5241.08	51	36	43.5	19.7339
	5241.09	55	48	51.5	25.4041
	5241.1	53	40	46.5	37.2992
	5241.12	46	35	40.5	17.6539
	5241.13	92	73	82.5	50.4351
	5241.14	29	19	24	34.8074
	5241.16	30	17	23.5	12.4749
	5241.17	0	1	0.5	3.72519
	5241.22	1	0	0.5	0.906128
	5241.24	11	7	9	3.60498
	5241.25	23	23	23	14.5263
	5241.26	59	54	56.5	43.2312
	5241.27	0	1	0.5	2.64591
	5241.28	22	14	18	8.86209
	5241.29	18	17	17.5	34.1573
	5241.3	28	34	31	16.7864
	5241.31	9	5	7	24.9567
	5241.32	13	6	9.5	1.00724
	5241.33	64	75	69.5	46.5224
	5241.34	0	1	0.5	0.530311
	5241.35	4	5	4.5	27.9463
	5241.36	10	4	7	8.51361
	5241.37	52	59	55.5	26.7616
	5241.39	44	30	37	17.0836
	5241.4	55	52	53.5	25.7431
	5241.41	27	18	22.5	31.6177
	5241.42	28	17	22.5	30.5987
	5241.43	36	21	28.5	10.1232
	5241.44	82	55	68.5	51.2301
	5242.01	0	0	0	1.39217
	5242.05	27	23	25	14.5584
	5242.07	0	3	1.5	4.18433
	5242.08	20	27	23.5	19.7092
	5242.15	0	0	0	0.0464347
	5242.22	1	0	0.5	0.335458
	5242.23	0	0	0	1.93247
	5244.02	0	0	0	0.056416
	5244.11	0	0	0	0.0151889
	5244.25	1	0	0.5	16.8688
	5244.26	0	0	0	1.3657
	5244.27	0	0	0	0.0811523
	5244.29	0	0	0	0.0125851
	5245.08	0	0	0	0.112832
	5245.1	0	0	0	0.104153
	5245.14	0	0	0	0.246061
	5245.16	9	8	8.5	4.42996
	5245.18	25	14	19.5	28.0296
	5245.38	21	16	18.5	53.9945
	5245.4	0	3	1.5	41.724
	5246.01	0	0	0	0.91177
	5246.02	0	0	0	0.0125851
	5246.03	1	0	0.5	0.101115
	5246.04	11	17	14	55.5503
	5246.06	0	0	0	0.427026
	5246.08	33	36	34.5	8.84126
	5246.14	0	0	0	0.0551141
	5248.09	0	0	0	0.154927
	5248.26	18	16	17	52.949
	5248.33	3	0	1.5	2.35081
	5248.39	64	73	68.5	79.5566
	5249.01	47	39	43	39.5836
	5249.06	0	0	0	0.00867939
	5249.07	1	0	0.5	0.655294
	5249.08	3	0	1.5	13.2022
	5249.09	0	0	0	0.272099
	5249.11	47	38	42.5	36.962
	5249.12	0	0	0	0.00433969
	5249.15	0	0	0	0.0976431
	5249.16	0	0	0	0.00824542
	5249.18	0	0	0	0.0260382
	5249.2	0	0	0	9.30127
	5249.23	2	0	1	1.02547
	5249.24	0	0	0	0.192682
	5249.29	0	0	0	0.31593
	5249.3	0	0	0	0.0815862
	5249.33	9	5	7	53.7193
	5249.34	6	2	4	1.44382
	5249.38	10	12	11	28.3274
	5249.39	0	0	0	0.0863599
	5250.03	8	5	6.5	13.8688
	5250.07	10	7	8.5	28.9857
	5253.01	52	63	57.5	56.8517
	5253.03	35	51	43	29.0603
	5253.05	8	11	9.5	20.9581
	5253.11	35	33	34	18.0701
	5253.13	56	45	50.5	26.391
	5253.16	79	51	65	40.9845
	5253.17	26	18	22	18.258
	5253.18	69	68	68.5	43.4733
	5253.21	60	79	69.5	41.9644
	5253.29	52	55	53.5	45.1662
	5253.31	50	57	53.5	50.8907
	5253.4	64	58	61	49.7915
	5253.41	67	66	66.5	55.4188
	5253.42	0	3	1.5	0.337194
	5253.43	20	16	18	21.0866
	5255.08	0	3	1.5	23.7781
	5256.18	0	0	0	0.0698691
	5256.21	0	0	0	0.212211
	5256.3	0	0	0	0.244759
	5256.35	0	0	0	0.070737
	5256.37	0	0	0	0.0516424
	5257.01	11	22	16.5	2.58168
	5257.04	0	0	0	0.31159
	5257.09	0	0	0	36.315
	5257.16	0	0	0	0.802409
	5257.17	0	0	0	13.9274
	5257.2	0	0	0	0
	5257.21	23	25	24	31.7844
	5257.22	0	0	0	1.38132
	5257.23	0	0	0	0.0681332
	5257.26	0	0	0	2.13166
	5257.3	0	0	0	0.042529
	5258.01	0	0	0	0.0412271
	5258.02	0	0	0	0.0937374
	5258.06	0	0	0	0.042529
	5259.01	15	17	16	20.8896
	5259.02	0	0	0	0.241721
	5259.04	0	0	0	2.60989
	5259.05	0	0	0	0.962978
	5259.06	1	0	0.5	0.574142
	5259.09	0	0	0	0.210909
	5259.12	0	0	0	0.22523
	5259.13	1	2	1.5	1.81703
	5259.15	0	0	0	0.226532
	5259.23	0	0	0	0.0260382
	5260.03	69	76	72.5	54.2982
	5260.07	0	0	0	0.000433969
	5260.08	0	0	0	0.290326
	5263.03	0	0	0	0.0104153
	5263.05	2	2	2	7.92081
	5263.06	0	0	0	0.308986
	5263.1	11	3	7	23.9165
	5263.11	2	3	2.5	18.6971
	5263.16	0	0	0	0.0342836
	5263.17	9	10	9.5	13.8788
	5263.21	0	0	0	0.193116
	5263.31	3	1	2	24.8382
	5263.4	3	0	1.5	6.13936
	5265.02	2	0	1	0.341968
	5265.13	3	0	1.5	0.888769
	5265.16	10	6	8	11.6425
	5265.18	3	14	8.5	5.15556
	5265.19	4	8	6	2.83339
	5265.22	3	9	6	5.27012
	5265.23	24	37	30.5	45.1502
	5265.24	8	4	6	22.5044
	5265.26	6	7	6.5	3.87014
	5265.28	32	25	28.5	23.0559
	5265.33	37	37	37	34.4793
	5265.34	40	44	42	44.9918
	5265.35	16	13	14.5	12.09
	5265.38	0	0	0	0.0273401
	5265.39	0	0	0	1.00377
	5265.4	56	58	57	25.8303
	5265.41	23	40	31.5	20.9256
	5265.42	17	23	20	13.079
	5265.43	42	43	42.5	37.5627
	5270.18	0	0	0	0.0399252
	5270.21	0	0	0	0.0976431
	5271.01	3	5	4	15.8785
	5271.02	27	28	27.5	16.0695
	5271.03	3	2	2.5	20.9186
	5271.04	0	0	0	0.119776
	5271.08	7	3	5	16.5585
	5271.11	26	13	19.5	21.8208
	5271.14	1	0	0.5	1.35659
	5271.16	8	7	7.5	42.7165
	5271.17	6	10	8	9.86369
	5271.18	0	0	0	1.68554
	5271.21	12	7	9.5	30.0511
	5271.24	0	0	0	0.098945
	5271.25	0	0	0	0.0690011
	5271.26	1	4	2.5	39.5711
	5271.28	0	1	0.5	6.7122
	5272.01	0	0	0	0.685672
	5272.05	0	0	0	0.0867939
	5272.06	0	0	0	0.0303779
	5273.01	0	0	0	0.0216985
	5276.01	25	17	21	17.2216
	5276.02	0	0	0	0.910034
	5276.05	0	0	0	0.33459
	5276.08	2	5	3.5	19.8463
	5276.12	1	2	1.5	25.704
	5276.14	0	0	0	0.0507744
	5278.01	20	22	21	7.2091
	5278.02	22	17	19.5	6.78338
	5278.03	13	20	16.5	5.04923
	5278.04	17	20	18.5	4.88346
	5278.05	23	18	20.5	32.1702
	5278.06	9	6	7.5	1.31753
	5278.08	5	4	4.5	0.882694
	5278.1	23	22	22.5	23.6492
	5278.12	10	18	14	3.29687
	5278.13	1	0	0.5	0.0390572
	5278.15	11	4	7.5	1.31927
	5278.16	21	20	20.5	10.1245
	5278.17	25	24	24.5	5.03188
	5278.19	16	16	16	4.43604
	5278.2	5	6	5.5	0.636633
	5278.21	10	15	12.5	0.985978
	5278.22		15	15	1.02807
	5278.23	20	17	18.5	4.14658
	5278.24		19	19	4.15309
	5278.25	40	45	42.5	28.576
	5278.26	19	9	14	21.2988
	5278.27	24	17	20.5	22.812
	5278.28	20	34	27	9.45055
	5278.29	25	28	26.5	10.131
	5278.31	13	23	18	21.2432
	5278.32	31	23	27	6.98951
	5278.34	14	9	11.5	33.39
	5278.35	18	16	17	4.90299
	5278.36	24	17	20.5	8.04709
	5278.37	4	9	6.5	8.26842
	5278.38	0	10	5	3.69091
	5278.39	3	10	6.5	10.0594
	5278.4	34	35	34.5	43.4243
	5278.42	44	41	42.5	45.8476
	5278.43	39	45	42	51.5859
	5278.44	50	32	41	43.3609
	5280.01	0	0	0	0.716483
	5280.02	0	0	0	0.467819
	5280.03	18	15	16.5	37.9155
	5280.05	0	0	0	3.14324
	5280.06	0	0	0	0.0438309
	5280.1	22	23	22.5	46.1644
	5280.13	3	3	3	11.0471
	5280.14	0	0	0	1.78839
	5280.16	0	0	0	0.0729069
	5280.2	4	9	6.5	39.7755
	5280.23	1	0	0.5	0.028208
	5280.24	0	0	0	12.139
	5280.25	12	5	8.5	21.7657
	5280.26	0	0	0	0.127153
	5280.28	7	5	6	22.8012
	5280.3	0	0	0	0.381025
	5280.32	0	1	0.5	3.23828
	5280.33	0	2	1	0.295967
	5280.35	0	0	0	1.31319
	5280.36	0	0	0	0.345874
	5280.39	0	0	0	0.0959072
	5280.4	0	2	1	0.391006
	5280.41	0	0	0	37.9068
	5282.05	80	72	76	62.1084
	5285.02	62	64	63	56.3713
	5285.03	0	0	0	1.62174
	5285.04	0	0	0	18.4059
	5285.06	39	51	45	58.7104
	5285.07	0	0	0	0.296835
	5285.08	0	0	0	0.123247
	9-17	19	18	18.5	23.3949
	9-18	2	6	4	31.9614
	9-29	19	20	19.5	34.4268
	9-31	19	25	22	29.789
	9-35	25	27	26	40.3349
	9-37	9	5	7	32.1146
	9-68	25	29	27	36.5098
